# Supplementary material
Source: PubMed Central journal article supplement (PMC2447118)
Supplement: supp_28_14_4642__2.pdf [file supp_28_14_4642__2.pdf]

| Region        | Start | End   | Forward                                           | Reverse                                                    |
|---------------|-------|-------|---------------------------------------------------|------------------------------------------------------------|
| Per E1        | -9095 | -8994 | CTA TAC ACA GAC ACG TGC ATA CAC CGA C             | CGG CTT CTT TGC TCA TTA TCA TCA ACG AAT C                  |
| Per E2        | -3066 | -2889 | CTC GCC AAT CTC AAA CGG AGC G                     | GGA ACA GTG CGA TCC GGA CAT G                              |
| Per E3 and E4 | -1504 | -1374 | GGC AGG CGT CTG TGA CTT TGT G                     | CTC CAC ACG CAG CTC CTT TGT G                              |
| Per Up 1      | -1274 | -1079 | GGC TGA TAA GGC ATA AAG ACA TCC TTG G             | GTG CAT TGA ATT TGG CTT TTA GTC TTC GC                     |
| Per E5 (CRS)  | -628  | -352  | CCA GTG CCA GTG CGA GTT C                         | GAT GCC AAG TGT CAA TCC AAG C                              |
| Per Up 3      | -81   | 107   | GAG AGC AGC GAG TGA GTG TGA G                     | GCG TGA TTC GAC AGG TCG TTG TTG                            |
| Per Up 3-2    | -144  | 6     | GTA TCT CAG CCG ACC AGC GAT TTC                   | GAA CAC TAG TGC TCG CAT CGC AAG                            |
| Per 56        | 452   | 608   | GTT CAT AAC GTC CAA TGG CGC ACT TAC               | GGA AGG AAG TGG TGG GGC ATT C                              |
| Per E6        | 826   | 946   | GGG CAT TGC ACC TTG GTA TTT TCA GC                | CTG CGA CTG CGG CTA TCC AAA TC                             |
| Per 67        | 1227  | 1392  | GGT TAA CCA GCG AGT TAC ACA ATC CTT GG            | GTT TCG ACG GCC CAG AAT TCA AGA AG                         |
| Per E7        | 1779  | 1933  | GGA TGC ATT GCG ACT GCA TAA CGA C                 | CCT GCA ACG AGG CTT CAC TGT G                              |
| Per E8        | 2086  | 2236  | CAA GCC ATG ATT CAT GAA CAT GAA TGG CAG           | CTT CAC GTT GCT CGC CAA TAG TAT TGT G                      |
| Per Trans     | 2559  | 2708  | CCA TTC AAG GTC CTA TCA AGG ATA ACT GAA GTG C     | CCT TGG TGT TGT GTG TGG ACT CC                             |
| Per MT        | 5992  | 6133  | CAA CGC TCT CCA GAT TCC CGA AC                    | GTG GTC TAT GGA CGA GTA TGG AGT TGA G                      |
| Tim Up 1      | -1242 | -1048 | GCC TGC AAC CAA CTG TTG ATT CC                    | GAA CGA CTC TGC CGT AGG CTT C                              |
| Tim E1        | -697  | -535  | GCG GCA CGT TGT GAT TAC AC                        | ACA CTG ACC GAA ACA CCC ACT C                              |
| Tim Up 3      | -198  | 41    | GCT ATT GAA GTT GCA TTT TAC ATA AGC CAA CAA CGA G | GAT CGT GTT ATA GTT TCA GTG CTG TTA TAT ACA CTG ATG        |
| Tim Up 3-2    | 5     | 188   | CAT CAG TGT ATA TAA CAG CAC TGA AAC TAT AAC ACG   | CTT ACC AAT TAT TTA AAT TTT TTC TAT CGC AGA CAA TTT TAC TG |
| Tim E2        | 1726  | 1917  | GGG AAC TTT CGG GGC TCG TCT G                     | CGC CAC CCA TGT GAC CAT CAA G                              |
| Tim Trans     | 2162  | 2307  | GTT ACA GAT ACC GCG CAA ATG GCT AAG               | CGG AGT TGC TAG TAA CCA GTC CAT AAC C                      |
| Tim LE        | 12152 | 12302 | CCA GAA TGT ATG TGA GCG ATG AGG AC                | CAA TTC TTT CCA GCT GGG TGG G                              |

**Supplemental Table 1.** Primers used for quantitative PCR (qPCR) and semi-quantitative PCR analysis of ChIP samples. Sense (forward) and antisense (reverse) primer sequences are indicated for each amplified region. All primer sequences are shown in the 5' to 3' orientation. The start and end of each amplified region is indicated relative to the *per* and *tim* transcription start (+1).
