# Supplementary material
Source: PubMed Central journal article supplement (PMC2447118)

17 kDa

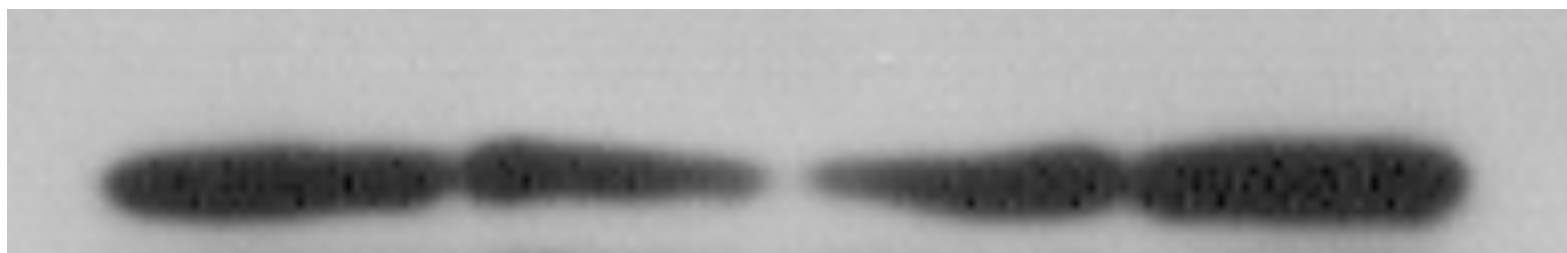

ZT

4

10

16

22

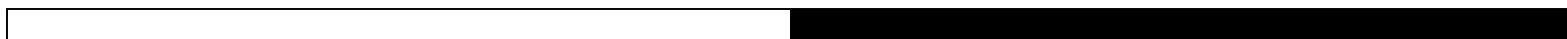

Supplement: supp_28_14_4642__1.pdf [file supp_28_14_4642__1.pdf]
